# Supplementary material for: The economic strategies of superorganisms
Source: Research Square preprint supplement (doi:10.21203/rs.3.rs-6087756/v1), 2025-03-04
Supplement: Supplementary file 1 [file 1ce645df0be637eeea0f28e9.docx]

Supplementary information

The economic strategies of superorganisms

Figures


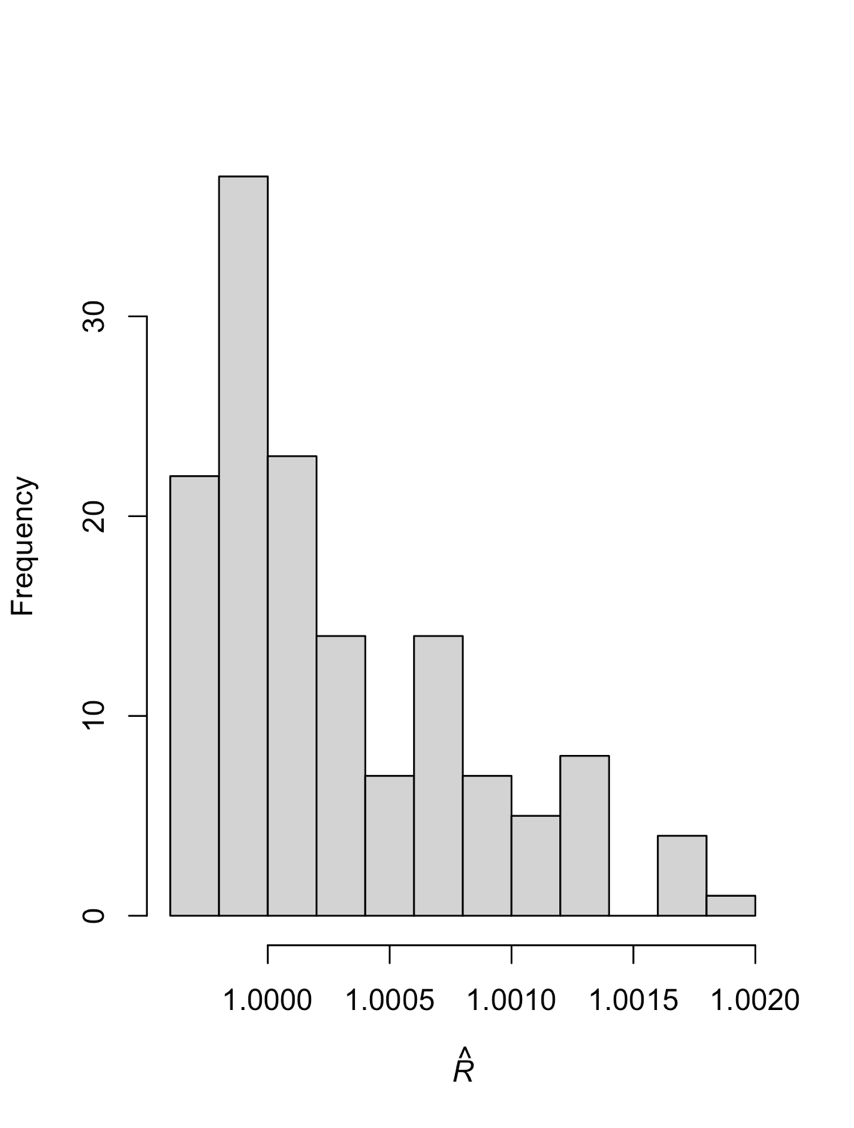


Figure S1: values for all variance parameters in the model were <1.01 indicating successful convergence of MCMC chains.


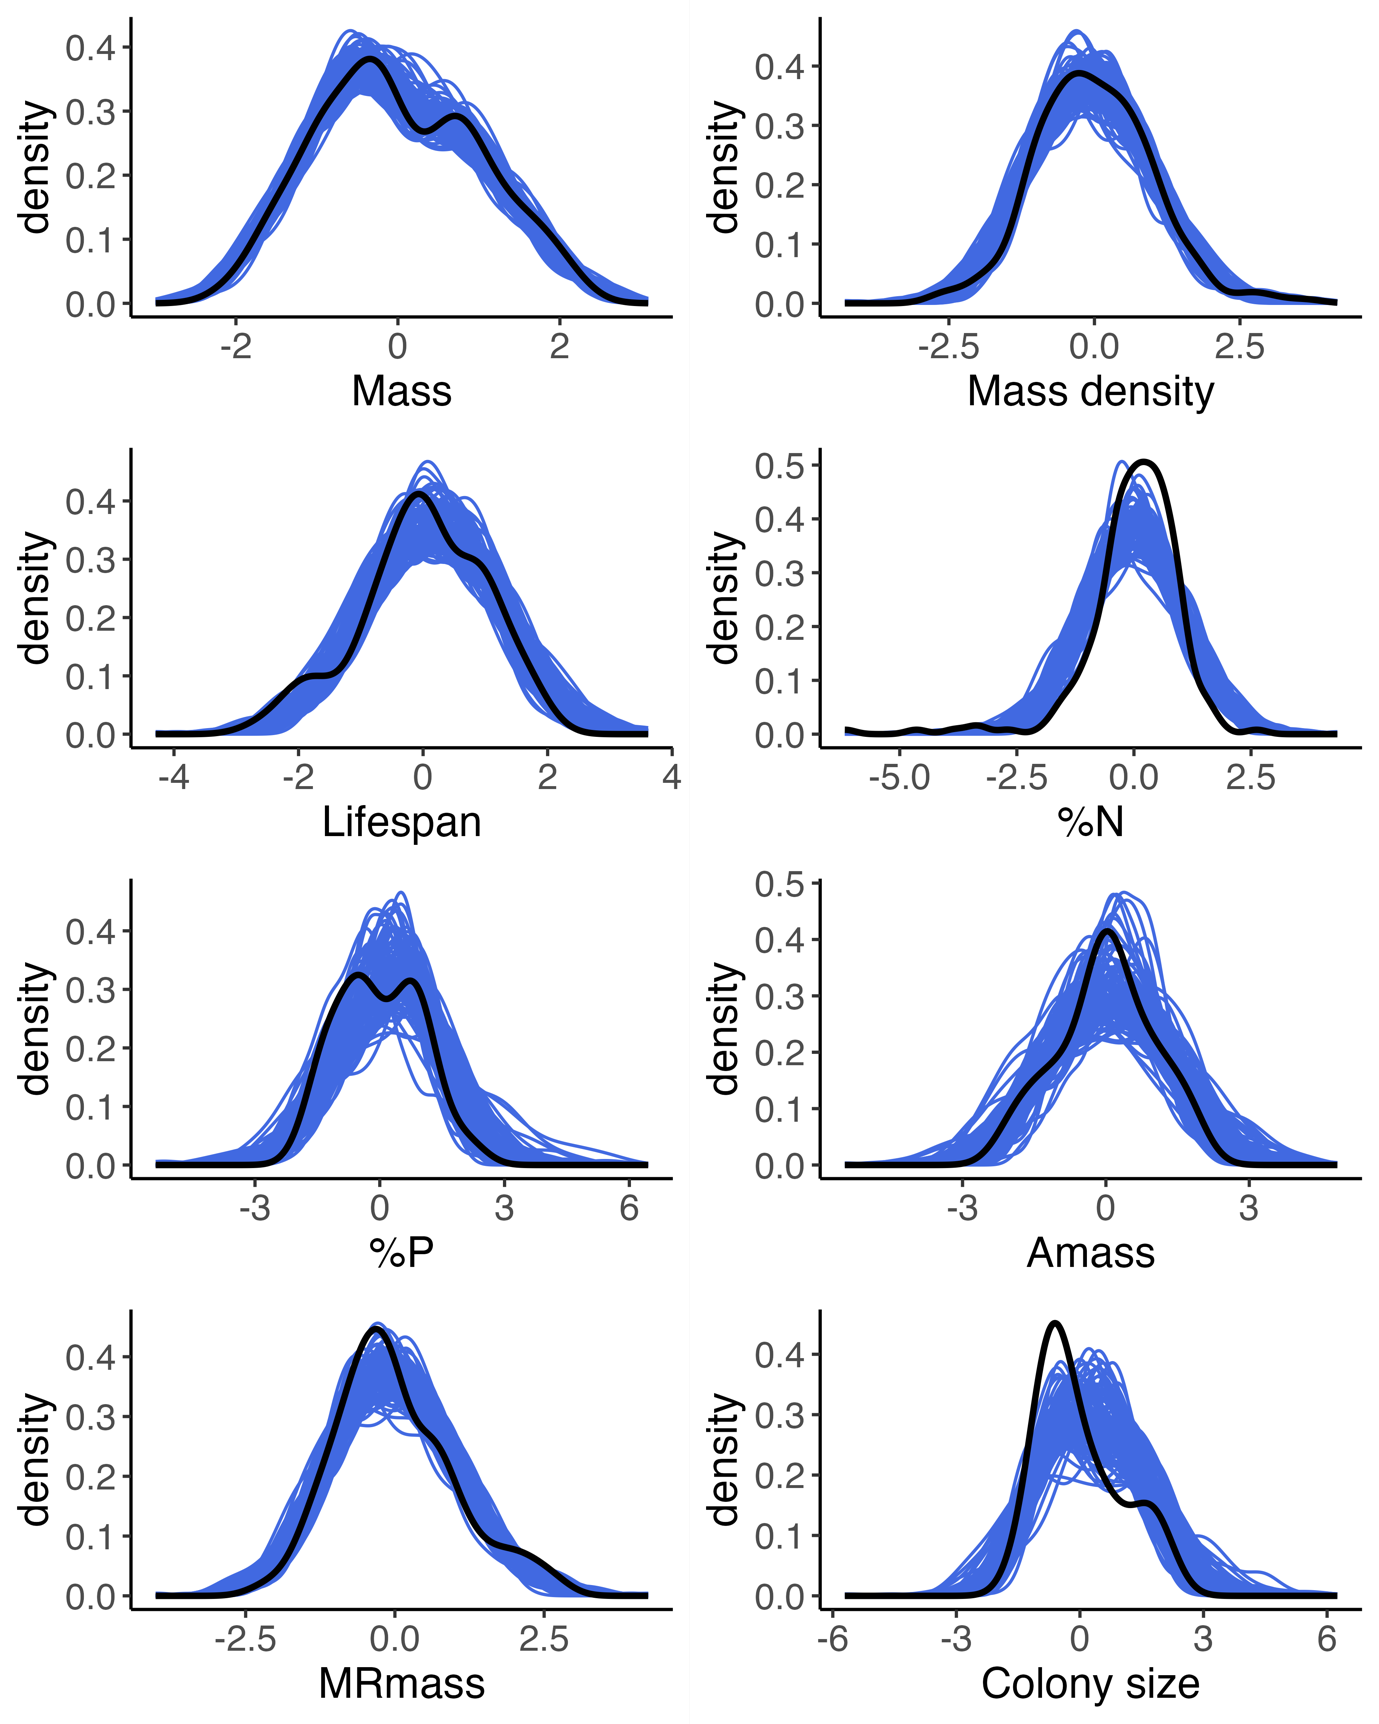


Figure S2: Posterior predictive checks (draws = 100) from the MR-PMM fit show good alignment between predicted data (in blue) and raw data (in black) (Extended data table 2).


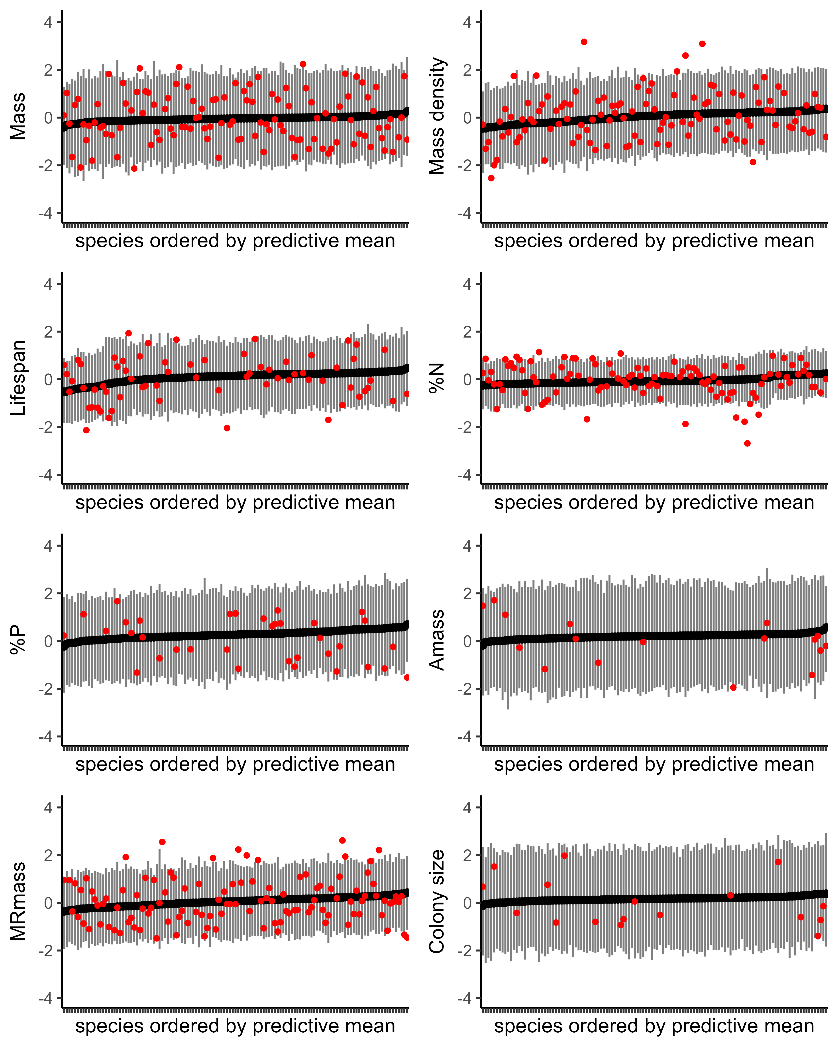

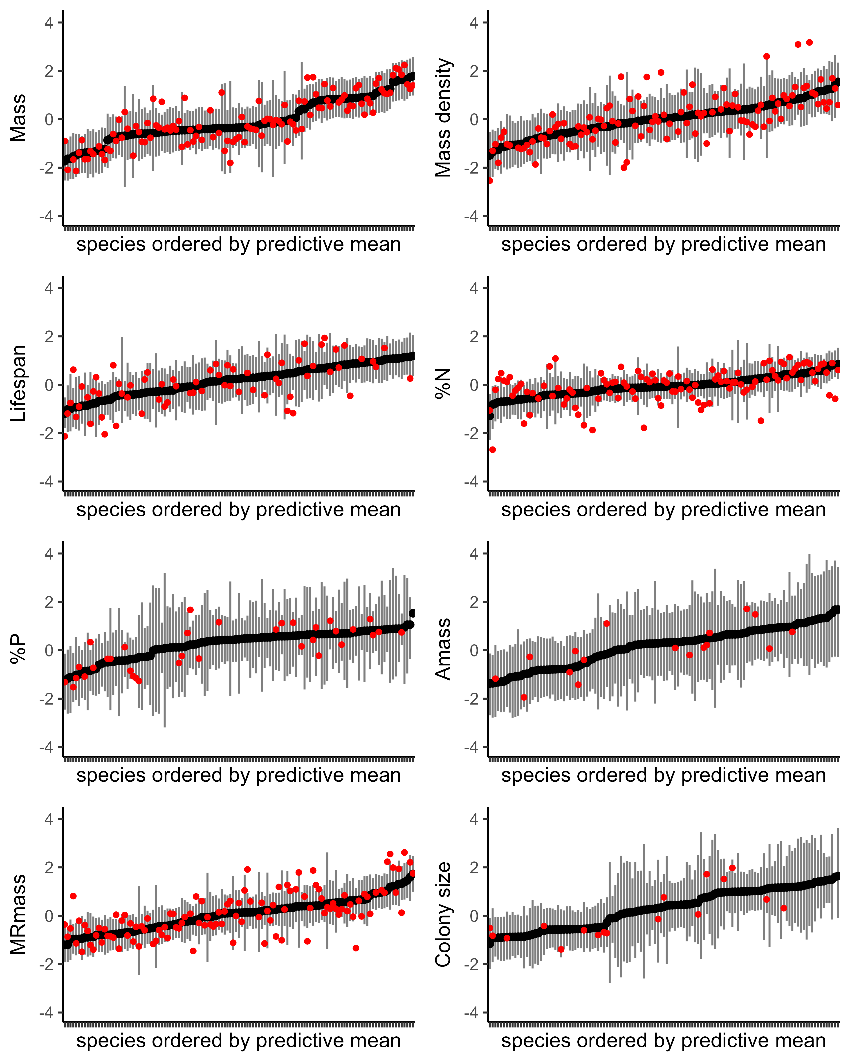


Figure S3. Observed species mean trait values (red points) superimposed over model predictions for left-out species based on LOO-CV. Black points indicate the posterior predictive mean for each species, grey bars indicate the 95% CI. X-axes are ordered by the predictive mean to assess the capacity of the models to predict the rank order of observed values. Predictions from a model including phylogenetic components (left) effectively capture the rank order of observations. Predictions from a model without phylogenetic effects (right) have higher uncertainty and fail to capture the rank order of observed values.


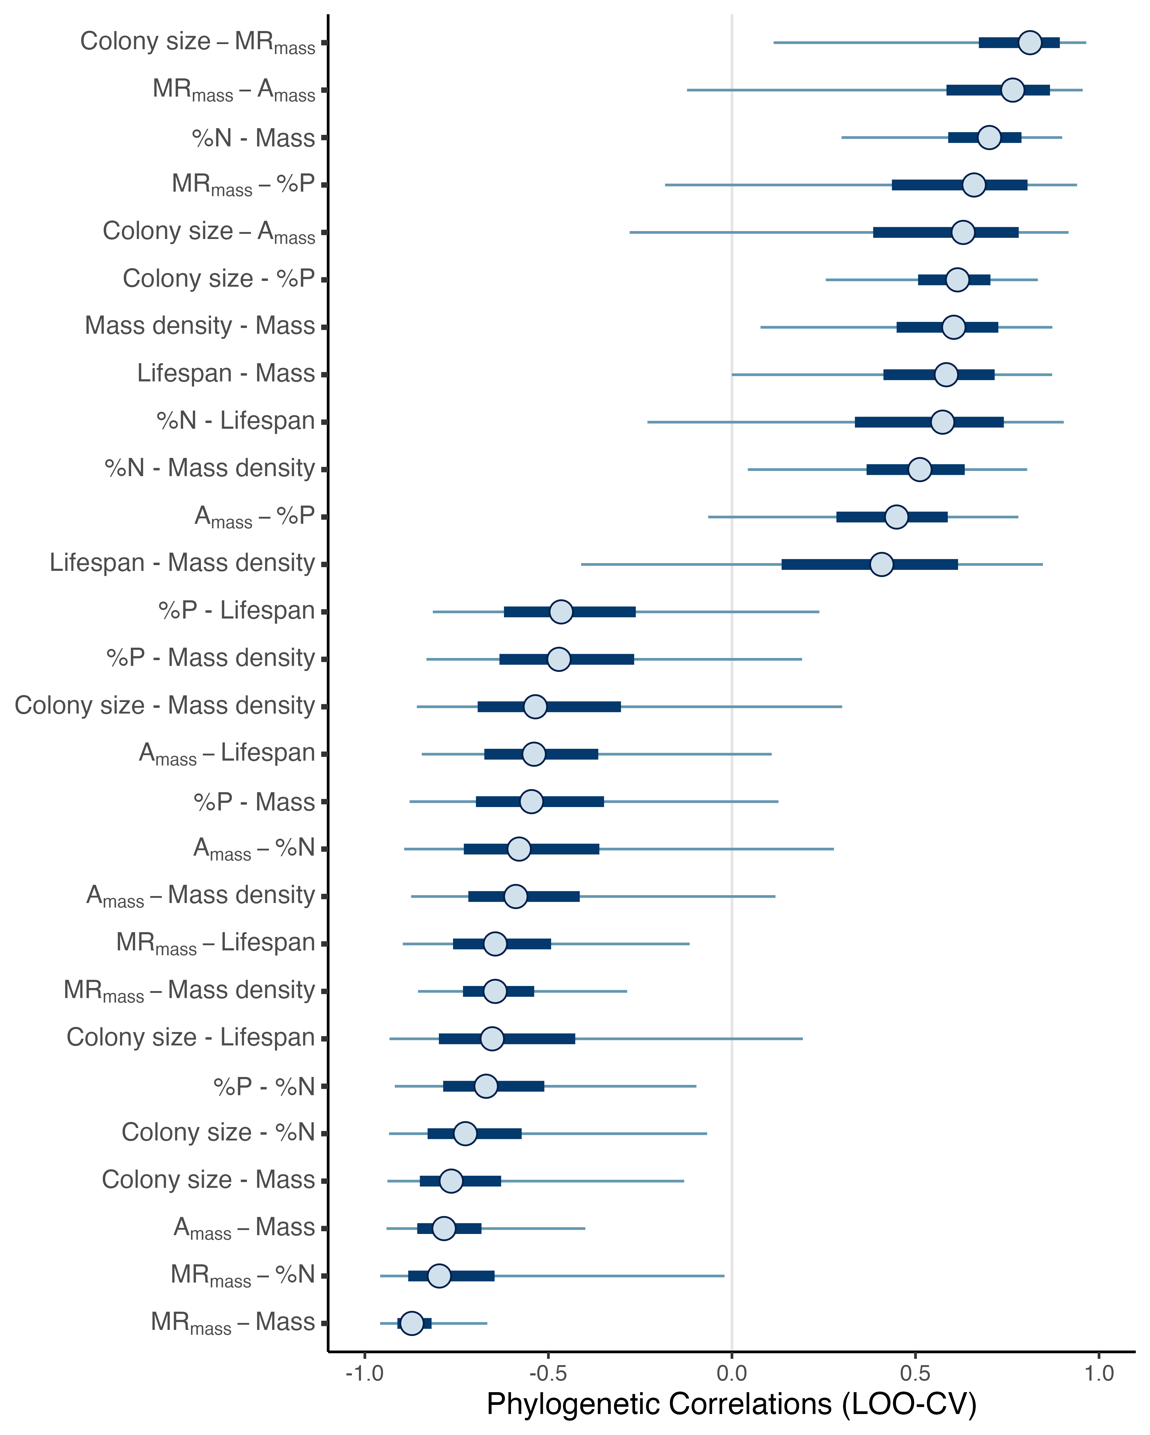


Figure S4. Estimates of phylogenetic correlations derived from combining posterior samples across LOO-CV fits have almost identical means and CIs to those fit to the full dataset (Fig.1a, Extended data table 3), indicating that parameter estimates are robust to cross validation.


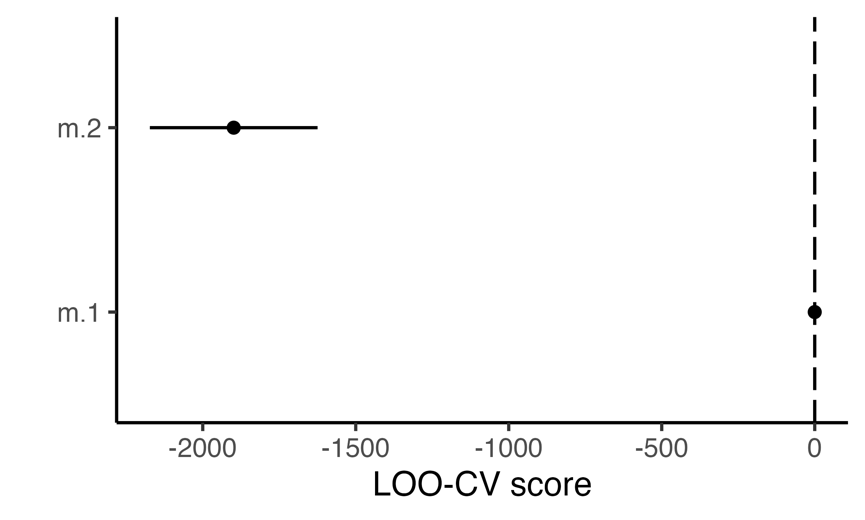


Figure S5: A model including phylogenetic trait (co)variances (m.1) substantially outperforms a model excluding phylogenetic trait (co)variances (m.2) based on LOO-CV scores.
