# Supplementary material for: The economic strategies of superorganisms
Source: Research Square preprint supplement (doi:10.21203/rs.3.rs-6087756/v1), 2025-03-04
Supplement: Supplementary file 3 [file 22dd95520045f226ba5bfeda.xlsx]

## Sheet: phylo correlations
Correlation	mean	0.025	0.975	Pmcmc	level	sig95	sig90	sig85	sig80
mr_mass:dry.mass	-0.854183	-0.958009	-0.666051	0	phy	1	1	1	1
mr_mass:n	-0.754067	-0.943028	-0.37068	0.001	phy	1	1	1	1
rhr_mass:dry.mass	-0.702431	-0.953776	0.0494557	0.0565	phy	0	1	1	1
colony.size:dry.mass	-0.70415	-0.940172	-0.091105	0.0345	phy	1	1	1	1
colony.size:n	-0.664775	-0.932925	-0.0469045	0.04	phy	1	1	1	1
p:n	-0.617821	-0.935309	0.0645558	0.0705	phy	0	1	1	1
colony.size:ls	-0.621717	-0.918345	-0.0760273	0.0295	phy	1	1	1	1
mr_mass:wmd	-0.626877	-0.857406	-0.29339	0.0015	phy	1	1	1	1
mr_mass:ls	-0.603789	-0.897318	-0.106815	0.024	phy	1	1	1	1
rhr_mass:wmd	-0.542052	-0.886701	0.140498	0.0905	phy	0	1	1	1
rhr_mass:n	-0.514086	-0.894458	0.274454	0.147	phy	0	0	1	1
p:dry.mass	-0.511123	-0.871245	0.192311	0.123	phy	0	0	1	1
rhr_mass:ls	-0.499308	-0.870782	0.131185	0.1045	phy	0	0	1	1
colony.size:wmd	-0.495924	-0.85561	0.133007	0.101	phy	0	0	1	1
p:wmd	-0.45468	-0.830066	0.169257	0.13	phy	0	0	1	1
p:ls	-0.455792	-0.839844	0.138193	0.1205	phy	0	0	1	1
ls:wmd	0.432107	-0.0603989	0.784163	0.0745	phy	0	1	1	1
rhr_mass:p	0.401968	-0.358919	0.857705	0.2575	phy	0	0	0	0
n:wmd	0.508213	0.0626389	0.821381	0.03	phy	1	1	1	1
n:ls	0.535386	-0.0160829	0.870359	0.057	phy	0	1	1	1
ls:dry.mass	0.568337	0.0544042	0.873723	0.0315	phy	1	1	1	1
wmd:dry.mass	0.589461	0.221863	0.828471	0.002	phy	1	1	1	1
colony.size:p	0.548375	-0.168132	0.917025	0.114	phy	0	0	1	1
colony.size:rhr_mass	0.581346	-0.208148	0.941122	0.131	phy	0	0	1	1
mr_mass:p	0.586469	-0.159565	0.924098	0.111	phy	0	0	1	1
n:dry.mass	0.675685	0.306495	0.899641	0.0025	phy	1	1	1	1
mr_mass:rhr_mass	0.669085	-0.172307	0.955025	0.0905	phy	0	1	1	1
colony.size:mr_mass	0.740946	0.0928151	0.964712	0.0375	phy	1	1	1	1

## Sheet: non-phylo independent corr
Correlation	mean	0.025	0.975	Pmcmc	level	sig95	sig90	sig85	sig80
colony.size:dry.mass	0.138428	-0.64167	0.778882	0.7	ind	0	0	0	0
colony.size:ls	-0.0419525	-0.733723	0.697135	0.919	ind	0	0	0	0
colony.size:mr_mass	-0.124099	-0.783205	0.674927	0.7265	ind	0	0	0	0
colony.size:n	0.0396046	-0.686716	0.746092	0.914	ind	0	0	0	0
colony.size:p	-0.0259347	-0.753489	0.706904	0.954	ind	0	0	0	0
colony.size:rhr_mass	-0.130144	-0.796869	0.665816	0.7415	ind	0	0	0	0
colony.size:wmd	0.0571368	-0.627534	0.706695	0.8745	ind	0	0	0	0
ls:dry.mass	0.0653746	-0.663561	0.756614	0.8565	ind	0	0	0	0
ls:wmd	-0.111665	-0.728751	0.597561	0.736	ind	0	0	0	0
mr_mass:dry.mass	-0.463899	-0.847361	0.136909	0.1	ind	0	1	1	1
mr_mass:ls	-0.0115901	-0.740028	0.725626	0.969	ind	0	0	0	0
mr_mass:n	-0.146806	-0.798831	0.671308	0.6905	ind	0	0	0	0
mr_mass:p	0.109955	-0.674936	0.790014	0.782	ind	0	0	0	0
mr_mass:rhr_mass	0.367518	-0.45319	0.849535	0.298	ind	0	0	0	0
mr_mass:wmd	-0.0331604	-0.637729	0.584526	0.9175	ind	0	0	0	0
n:dry.mass	0.114969	-0.67603	0.76791	0.756	ind	0	0	0	0
n:ls	-0.00687016	-0.708114	0.726839	0.988	ind	0	0	0	0
n:wmd	0.0424715	-0.651988	0.698787	0.8965	ind	0	0	0	0
p:dry.mass	-0.169981	-0.798955	0.648648	0.654	ind	0	0	0	0
p:ls	-0.00696225	-0.732896	0.709164	0.9925	ind	0	0	0	0
p:n	-0.0646262	-0.764393	0.67856	0.873	ind	0	0	0	0
p:wmd	-0.142622	-0.742384	0.600464	0.6685	ind	0	0	0	0
rhr_mass:dry.mass	-0.508858	-0.894142	0.222881	0.1335	ind	0	0	1	1
rhr_mass:ls	0.0194812	-0.753594	0.756095	0.9565	ind	0	0	0	0
rhr_mass:n	-0.106304	-0.812225	0.724185	0.785	ind	0	0	0	0
rhr_mass:p	0.109489	-0.691457	0.803472	0.783	ind	0	0	0	0
rhr_mass:wmd	-0.047114	-0.654799	0.611521	0.878	ind	0	0	0	0
wmd:dry.mass	0.0489114	-0.400509	0.462495	0.794	ind	0	0	0	0
