# Supplementary material for: The economic strategies of superorganisms
Source: Research Square preprint supplement (doi:10.21203/rs.3.rs-6087756/v1), 2025-03-04
Supplement: Supplementary file 4 [file e7f6096c8fd6aee2974bde17.xlsx]

## Sheet: model_summary
Iterations = 1:4000
Thinning interval = 1
Sample size = 4000
DIC: 1890.637

## Sheet: unstructured_between_species
G-structure: ~us(trait):animal
	post.mean	l-95% CI	u-95% CI	eff.samp
traitdry.mass:traitdry.mass.animal	1.3449	0.644735	2.13564	4000
traitwmd:traitdry.mass.animal	0.7518	0.14047	1.35831	4198.3
traitls:traitdry.mass.animal	0.5132	-0.00357	1.07265	3461.8
traitN:traitdry.mass.animal	0.6223	0.133619	1.18282	4000
traitP:traitdry.mass.animal	-0.771	-2.03071	0.244938	479.3
traitrhr_mass:traitdry.mass.animal	-0.9628	-2.18144	0.100556	511
traitmr_mass:traitdry.mass.animal	-1.0217	-1.69428	-0.450794	4000
traitcolony.size:traitdry.mass.animal	-1.0844	-2.3895	-0.039055	574.5
traitdry.mass:traitwmd.animal	0.7518	0.14047	1.35831	4198.3
traitwmd:traitwmd.animal	1.2157	0.482893	2.08211	3432.9
traitls:traitwmd.animal	0.3707	-0.095922	0.863114	3573.1
traitN:traitwmd.animal	0.4457	0.009847	0.973335	3712.7
traitP:traitwmd.animal	-0.6434	-1.68622	0.240998	903.8
traitrhr_mass:traitwmd.animal	-0.7069	-1.73574	0.24379	750.1
traitmr_mass:traitwmd.animal	-0.711	-1.29553	-0.189933	4000
traitcolony.size:traitwmd.animal	-0.7247	-1.82753	0.20082	718.3
traitdry.mass:traitls.animal	0.5132	-0.00357	1.07265	3461.8
traitwmd:traitls.animal	0.3707	-0.095922	0.863114	3573.1
traitls:traitls.animal	0.6271	0.177207	1.27021	3363.8
traitN:traitls.animal	0.3349	-0.044887	0.797892	3155.2
traitP:traitls.animal	-0.4534	-1.25571	0.171588	1169.1
traitrhr_mass:traitls.animal	-0.4513	-1.16557	0.214479	1157.8
traitmr_mass:traitls.animal	-0.4874	-1.02459	-0.019991	3456
traitcolony.size:traitls.animal	-0.6331	-1.46825	-0.004107	1569.3
traitdry.mass:traitN.animal	0.6223	0.133619	1.18282	4000
traitwmd:traitN.animal	0.4457	0.009847	0.973335	3712.7
traitls:traitN.animal	0.3349	-0.044887	0.797892	3155.2
traitN:traitN.animal	0.6591	0.138674	1.31574	3722.2
traitP:traitN.animal	-0.6342	-1.59766	0.128311	695.7
traitrhr_mass:traitN.animal	-0.4886	-1.38886	0.250287	584.3
traitmr_mass:traitN.animal	-0.6205	-1.16337	-0.150529	3452.1
traitcolony.size:traitN.animal	-0.7092	-1.74659	-0.002081	790.5
traitdry.mass:traitP.animal	-0.771	-2.03071	0.244938	479.3
traitwmd:traitP.animal	-0.6434	-1.68622	0.240998	903.8
traitls:traitP.animal	-0.4534	-1.25571	0.171588	1169.1
traitN:traitP.animal	-0.6342	-1.59766	0.128311	695.7
traitP:traitP.animal	1.6572	0.201032	3.88536	702.7
traitrhr_mass:traitP.animal	0.6296	-0.575713	2.16957	544.8
traitmr_mass:traitP.animal	0.7887	-0.22856	2.03168	545.9
traitcolony.size:traitP.animal	0.9552	-0.332877	2.83415	497.4
traitdry.mass:traitrhr_mass.animal	-0.9628	-2.18144	0.100556	511
traitwmd:traitrhr_mass.animal	-0.7069	-1.73574	0.24379	750.1
traitls:traitrhr_mass.animal	-0.4513	-1.16557	0.214479	1157.8
traitN:traitrhr_mass.animal	-0.4886	-1.38886	0.250287	584.3
traitP:traitrhr_mass.animal	0.6296	-0.575713	2.16957	544.8
traitrhr_mass:traitrhr_mass.animal	1.5166	0.12808	3.76698	334
traitmr_mass:traitrhr_mass.animal	0.8235	-0.160828	2.06976	489.2
traitcolony.size:traitrhr_mass.animal	0.9119	-0.485151	2.59087	482
traitdry.mass:traitmr_mass.animal	-1.0217	-1.69428	-0.450794	4000
traitwmd:traitmr_mass.animal	-0.711	-1.29553	-0.189933	4000
traitls:traitmr_mass.animal	-0.4874	-1.02459	-0.019991	3456
traitN:traitmr_mass.animal	-0.6205	-1.16337	-0.150529	3452.1
traitP:traitmr_mass.animal	0.7887	-0.22856	2.03168	545.9
traitrhr_mass:traitmr_mass.animal	0.8235	-0.160828	2.06976	489.2
traitmr_mass:traitmr_mass.animal	1.0697	0.431371	1.79268	4000
traitcolony.size:traitmr_mass.animal	1.0193	0.046378	2.29556	578.3
traitdry.mass:traitcolony.size.animal	-1.0844	-2.3895	-0.039055	574.5
traitwmd:traitcolony.size.animal	-0.7247	-1.82753	0.20082	718.3
traitls:traitcolony.size.animal	-0.6331	-1.46825	-0.004107	1569.3
traitN:traitcolony.size.animal	-0.7092	-1.74659	-0.002081	790.5
traitP:traitcolony.size.animal	0.9552	-0.332877	2.83415	497.4
traitrhr_mass:traitcolony.size.animal	0.9119	-0.485151	2.59087	482
traitmr_mass:traitcolony.size.animal	1.0193	0.046378	2.29556	578.3
traitcolony.size:traitcolony.size.animal	1.8386	0.189835	4.2427	569.3

## Sheet: unstructured_within_species
~us(trait):species
	post.mean	l-95% CI	u-95% CI	eff.samp
traitdry.mass:traitdry.mass.species	0.1387	0.08691	0.19708	4000
traitwmd:traitdry.mass.species	0.007779	-0.04694	0.06034	3608.4
traitls:traitdry.mass.species	0.005094	-0.05124	0.05603	3309.7
traitN:traitdry.mass.species	0.006407	-0.02619	0.04927	4656.9
traitP:traitdry.mass.species	-0.01421	-0.08431	0.04053	2059.5
traitrhr_mass:traitdry.mass.species	-0.09319	-0.2402	0.02236	947.6
traitmr_mass:traitdry.mass.species	-0.0383	-0.08994	0.00714	3190.2
traitcolony.size:traitdry.mass.species	0.01539	-0.06643	0.10921	1782
traitdry.mass:traitwmd.species	0.007779	-0.04694	0.06034	3608.4
traitwmd:traitwmd.species	0.1363	5.794e-08	0.27686	3156.5
traitls:traitwmd.species	-0.009595	-0.08289	0.03837	3454.2
traitN:traitwmd.species	0.002281	-0.03267	0.04043	3747
traitP:traitwmd.species	-0.01372	-0.08285	0.03869	3217
traitrhr_mass:traitwmd.species	-0.008287	-0.1306	0.11551	2426.8
traitmr_mass:traitwmd.species	-0.002529	-0.05292	0.04955	3631.9
traitcolony.size:traitwmd.species	0.006316	-0.08177	0.09644	2576.2
traitdry.mass:traitls.species	0.005094	-0.05124	0.05603	3309.7
traitwmd:traitls.species	-0.009595	-0.08289	0.03837	3454.2
traitls:traitls.species	0.04841	5.207e-11	0.17019	3305.5
traitN:traitls.species	-0.0002125	-0.0233	0.02479	4000
traitP:traitls.species	-0.0006829	-0.03978	0.03563	3702.6
traitrhr_mass:traitls.species	0.003651	-0.07876	0.09329	3078.3
traitmr_mass:traitls.species	1.301e-05	-0.04482	0.03538	3346.1
traitcolony.size:traitls.species	-0.003857	-0.05788	0.05236	3086.6
traitdry.mass:traitN.species	0.006407	-0.02619	0.04927	4656.9
traitwmd:traitN.species	0.002281	-0.03267	0.04043	3747
traitls:traitN.species	-0.0002125	-0.0233	0.02479	4000
traitN:traitN.species	0.01861	2.438e-11	0.0701	4000
traitP:traitN.species	-0.002328	-0.02932	0.01916	4000
traitrhr_mass:traitN.species	-0.00793	-0.07231	0.04429	3577.4
traitmr_mass:traitN.species	-0.005444	-0.03489	0.01651	4000
traitcolony.size:traitN.species	0.001531	-0.02871	0.03984	4000
traitdry.mass:traitP.species	-0.01421	-0.08431	0.04053	2059.5
traitwmd:traitP.species	-0.01372	-0.08285	0.03869	3217
traitls:traitP.species	-0.0006829	-0.03978	0.03563	3702.6
traitN:traitP.species	-0.002328	-0.02932	0.01916	4000
traitP:traitP.species	0.04642	6.96e-08	0.17141	2905.2
traitrhr_mass:traitP.species	0.0124	-0.06578	0.12013	2268.1
traitmr_mass:traitP.species	0.005085	-0.03456	0.04815	3023.8
traitcolony.size:traitP.species	-0.001994	-0.05977	0.04782	3348.3
traitdry.mass:traitrhr_mass.species	-0.09319	-0.2402	0.02236	947.6
traitwmd:traitrhr_mass.species	-0.008287	-0.1306	0.11551	2426.8
traitls:traitrhr_mass.species	0.003651	-0.07876	0.09329	3078.3
traitN:traitrhr_mass.species	-0.00793	-0.07231	0.04429	3577.4
traitP:traitrhr_mass.species	0.0124	-0.06578	0.12013	2268.1
traitrhr_mass:traitrhr_mass.species	0.2492	1.152e-07	0.64459	1029.4
traitmr_mass:traitrhr_mass.species	0.03994	-0.02944	0.1364	1770.5
traitcolony.size:traitrhr_mass.species	-0.02013	-0.1593	0.09578	1997.4
traitdry.mass:traitmr_mass.species	-0.0383	-0.08994	0.00714	3190.2
traitwmd:traitmr_mass.species	-0.002529	-0.05292	0.04955	3631.9
traitls:traitmr_mass.species	1.301e-05	-0.04482	0.03538	3346.1
traitN:traitmr_mass.species	-0.005444	-0.03489	0.01651	4000
traitP:traitmr_mass.species	0.005085	-0.03456	0.04815	3023.8
traitrhr_mass:traitmr_mass.species	0.03994	-0.02944	0.1364	1770.5
traitmr_mass:traitmr_mass.species	0.05204	1.587e-09	0.13043	3500.4
traitcolony.size:traitmr_mass.species	-0.008846	-0.07738	0.03744	2150.5
traitdry.mass:traitcolony.size.species	0.01539	-0.06643	0.10921	1782
traitwmd:traitcolony.size.species	0.006316	-0.08177	0.09644	2576.2
traitls:traitcolony.size.species	-0.003857	-0.05788	0.05236	3086.6
traitN:traitcolony.size.species	0.001531	-0.02871	0.03984	4000
traitP:traitcolony.size.species	-0.001994	-0.05977	0.04782	3348.3
traitrhr_mass:traitcolony.size.species	-0.02013	-0.1593	0.09578	1997.4
traitmr_mass:traitcolony.size.species	-0.008846	-0.07738	0.03744	2150.5
traitcolony.size:traitcolony.size.species	0.09617	1.546e-07	0.34813	1190.8

## Sheet: fixed_effects
Location effects: dry.mass, wmd, ls, N, P, rhr_mass, mr_mass, colony.size ~ trait - 1 + trait:mat.micro + trait:mavpd.micro + trait:p.soil
	post.mean	l-95% CI	u-95% CI	eff.samp	pMCMC
traitdry.mass	-1.075	-4.82	3.034	4000	0.484
traitwmd	-1.771	-12.35	9.073	3773	0.676
traitls	-6.828	-27.3	11.59	2801	0.39
traitN	-1.281	-9.919	5.98	4000	0.617
traitP	0.03982	-13.38	13.91	2469	0.996
traitrhr_mass	-0.01894	-1.309	1.168	1555	0.985
traitmr_mass	-0.8333	-13.21	8.995	4000	0.944
traitcolony.size	0.135	-1.144	1.473	2143	0.835
traitdry.mass:mat.micro	0.3986	-1.138	1.926	3654	0.478
traitwmd:mat.micro	0.823	-3.578	5.127	3799	0.61
traitls:mat.micro	2.695	-4.527	10.7	2968	0.383
traitN:mat.micro	0.5706	-2.511	3.624	4000	0.577
traitP:mat.micro	0.06226	-4.82	5.659	2656	0.986
traitmr_mass:mat.micro	0.0781	-3.836	4.917	4000	0.955
traitdry.mass:mavpd.micro	-0.02768	-0.4664	0.4821	3684	0.914
traitwmd:mavpd.micro	-0.0005116	-1.403	1.341	4000	0.955
traitls:mavpd.micro	-0.457	-2.867	1.582	4000	0.578
traitN:mavpd.micro	-0.2061	-1.028	0.7648	4000	0.536
traitP:mavpd.micro	-0.2423	-1.812	1.198	3498	0.68
traitmr_mass:mavpd.micro	0.3667	-0.7919	2.08	3690	0.524
traitdry.mass:p.soil	0.004218	-0.04096	0.04884	4000	0.859
traitwmd:p.soil	-0.03354	-0.1271	0.05569	3690	0.466
traitls:p.soil	0.049	-0.1113	0.2216	3080	0.56
traitN:p.soil	0.01472	-0.08966	0.1153	3796	0.776
traitP:p.soil	0.05783	-0.1229	0.2364	2090	0.518
traitmr_mass:p.soil	-0.02413	-0.1191	0.0609	3747	0.624

## Sheet: unstructured_residual
R-structure: ~us(trait):units
	post.mean	l-95% CI	u-95% CI	eff.samp
traitdry.mass:traitdry.mass.units	0.0831606	0.066993	0.101082	4335
traitwmd:traitdry.mass.units	0.0254939	-0.002097	0.053746	3755
traitls:traitdry.mass.units	0.0131598	-0.024124	0.048361	3726
traitN:traitdry.mass.units	-0.0006778	-0.037581	0.036974	4000
traitP:traitdry.mass.units	-0.0058556	-0.046423	0.033324	3669
traitrhr_mass:traitdry.mass.units	-0.0031701	-0.040295	0.033918	3501
traitmr_mass:traitdry.mass.units	-0.0269291	-0.059185	0.001338	4000
traitcolony.size:traitdry.mass.units	0.0028713	-0.037131	0.039316	4000
traitdry.mass:traitwmd.units	0.0254939	-0.002097	0.053746	3755
traitwmd:traitwmd.units	0.329667	0.237366	0.430519	3273
traitls:traitwmd.units	-0.01894	-0.110375	0.069233	3537
traitN:traitwmd.units	-0.0590422	-0.142811	0.018117	4000
traitP:traitwmd.units	0.0131997	-0.087545	0.115575	3366
traitrhr_mass:traitwmd.units	0.0092641	-0.100853	0.107887	3086
traitmr_mass:traitwmd.units	-0.0223094	-0.087546	0.039839	4000
traitcolony.size:traitwmd.units	0.0128403	-0.09423	0.11702	2716
traitdry.mass:traitls.units	0.0131598	-0.024124	0.048361	3726
traitwmd:traitls.units	-0.01894	-0.110375	0.069233	3537
traitls:traitls.units	0.532247	0.387537	0.695826	3623
traitN:traitls.units	0.0214569	-0.156125	0.189601	2247
traitP:traitls.units	-0.0648752	-0.216071	0.094638	2076
traitrhr_mass:traitls.units	0.032622	-0.118817	0.192578	2660
traitmr_mass:traitls.units	-0.0315887	-0.160254	0.09778	2434
traitcolony.size:traitls.units	-0.0220386	-0.172793	0.132324	3055
traitdry.mass:traitN.units	-0.0006778	-0.037581	0.036974	4000
traitwmd:traitN.units	-0.0590422	-0.142811	0.018117	4000
traitls:traitN.units	0.0214569	-0.156125	0.189601	2247
traitN:traitN.units	0.804857	0.649529	0.987279	4000
traitP:traitN.units	-0.0987962	-0.332958	0.149648	1630
traitrhr_mass:traitN.units	-0.0229035	-0.261708	0.19044	1979
traitmr_mass:traitN.units	-0.0159275	-0.108518	0.077262	4000
traitcolony.size:traitN.units	-0.0363031	-0.245136	0.198126	1969
traitdry.mass:traitP.units	-0.0058556	-0.046423	0.033324	3669
traitwmd:traitP.units	0.0131997	-0.087545	0.115575	3366
traitls:traitP.units	-0.0648752	-0.216071	0.094638	2076
traitN:traitP.units	-0.0987962	-0.332958	0.149648	1630
traitP:traitP.units	0.54205	0.340171	0.778757	3097
traitrhr_mass:traitP.units	0.0150631	-0.14786	0.185152	2923
traitmr_mass:traitP.units	0.0183439	-0.145883	0.174331	2458
traitcolony.size:traitP.units	0.0128727	-0.15183	0.183956	2850
traitdry.mass:traitrhr_mass.units	-0.0031701	-0.040295	0.033918	3501
traitwmd:traitrhr_mass.units	0.0092641	-0.100853	0.107887	3086
traitls:traitrhr_mass.units	0.032622	-0.118817	0.192578	2660
traitN:traitrhr_mass.units	-0.0229035	-0.261708	0.19044	1979
traitP:traitrhr_mass.units	0.0150631	-0.14786	0.185152	2923
traitrhr_mass:traitrhr_mass.units	0.43545	0.232853	0.690579	2374
traitmr_mass:traitrhr_mass.units	0.005257	-0.125208	0.159766	2673
traitcolony.size:traitrhr_mass.units	-0.0136222	-0.191115	0.159611	2569
traitdry.mass:traitmr_mass.units	-0.0269291	-0.059185	0.001338	4000
traitwmd:traitmr_mass.units	-0.0223094	-0.087546	0.039839	4000
traitls:traitmr_mass.units	-0.0315887	-0.160254	0.09778	2434
traitN:traitmr_mass.units	-0.0159275	-0.108518	0.077262	4000
traitP:traitmr_mass.units	0.0183439	-0.145883	0.174331	2458
traitrhr_mass:traitmr_mass.units	0.005257	-0.125208	0.159766	2673
traitmr_mass:traitmr_mass.units	0.436398	0.348598	0.543784	3717
traitcolony.size:traitmr_mass.units	-0.008596	-0.139282	0.147688	2601
traitdry.mass:traitcolony.size.units	0.0028713	-0.037131	0.039316	4000
traitwmd:traitcolony.size.units	0.0128403	-0.09423	0.11702	2716
traitls:traitcolony.size.units	-0.0220386	-0.172793	0.132324	3055
traitN:traitcolony.size.units	-0.0363031	-0.245136	0.198126	1969
traitP:traitcolony.size.units	0.0128727	-0.15183	0.183956	2850
traitrhr_mass:traitcolony.size.units	-0.0136222	-0.191115	0.159611	2569
traitmr_mass:traitcolony.size.units	-0.008596	-0.139282	0.147688	2601
traitcolony.size:traitcolony.size.units	0.445761	0.243751	0.68503	2638
